# Supplementary material for: Modification of Cu–ZnO–ZrO2 catalysts with La2O3 to quantitatively tune Cu+–Cu0 dual sites for hydrogenation of dimethyl adipate to produce 1,6-hexanediol
Source: Royal Society of Chemistry journal article supplement (doi:10.1039/d3cy00747b), 2023-01-01
Supplement: d3cy00747b1.pdf [file d3cy00747b1.pdf]

## Supplementary Information

### **Modification of Cu-ZnO-ZrO<sub>2</sub> catalysts by La<sub>2</sub>O<sub>3</sub> to quantitatively tune Cu<sup>+</sup>-Cu<sup>0</sup> dual sites for hydrogenation of dimethyl adipate to produce 1,6-hexanediol**

Xianlong Gao, Guoqing Zhao, Lei Miao, Lei Li and Zhirong Zhu\*

*(School of Chemical Science and Engineering, Tongji University, Shanghai 200092,  
P. R. China.)*

**\*Corresponding author.**

E-mail address: zhuzhirong@tongji.edu.cn (Z. Zhu).

Tel./fax: +8621-65982563.

## Characterization of catalyst

X-ray diffraction (XRD) analysis was carried out on a X-ray diffraction (Rigaku D/Max-2500, Japan) using nickel filtered Cu K $\alpha$  ( $\lambda$ = 0.15406 nm) radiation. The scan rate, diffraction range, tube voltage and tube current were 8 °/min, from 10 ° to 80 °, 40 kV and 100 mA, respectively.

Nitrogen adsorption-desorption proles at -196 °C were obtained by a Quantachrome Automated Gas Sorption apparatus (Micromeritics ASAP 2020). The samples were dehydrated at 300 °C using vacuum degassing for 12 h before experiments. The specific surface area was calculated by the BET (Brunauer-Emmett-Teller) method.

Transmission electron microscopy (TEM) micrograph was obtained using a JEOL JEMF200 election microscope operating at 200 kV.

The elemental compositions of catalysts were measured by inductively coupled plasma optical emission spectroscopy (ICP-OES).

X-ray photoelectron spectroscopy (XPS) measurements were performed on Escalab 250 (Thermo Fisher VG) with a monochromatic X-ray source of Al K $\alpha$  under ultra-high vacuum ( $2.4\times 10^{-8}$  Pa). The deconvolution method of XPS spectra was fitted by Gaussian function.

Thermo gravimetric analysis (TGA) of the spent catalyst was carried out on a METTLER TGA/DSC1/1600HT apparatus in air atmosphere at a heating rate of 10 °C/min.

CO<sub>2</sub> temperature-programmed desorption (CO<sub>2</sub>-TPD) was performed on a ChemBET Pulsar & TPR/TPD apparatus (Quantachrome Instruments) equipped with a TCD.

H<sub>2</sub> temperature-programmed desorption (H<sub>2</sub>-TPD) was performed on a ChemBET Pulsar & TPR/TPD apparatus (Quantachrome Instruments) equipped with a TCD. 70 mg of the catalyst precursors was reduced in H<sub>2</sub>-Ar gas (10% H<sub>2</sub>, 30 ml·min<sup>-1</sup>) at 350 °C for 4 h firstly, and then cooled to 40 °C under a He flow (30 ml·min<sup>-1</sup>). Then, the sample adsorbed H<sub>2</sub> in a 10% H<sub>2</sub>-He flow (30 ml·min<sup>-1</sup>) for 60 min. Subsequently, the sample was purged by He flow (30 ml·min<sup>-1</sup>) at 50 °C for 60 min. After that, the H<sub>2</sub>-TPD signal was recorded in a He flow by a TCD detector from 50 to 400 °C at a heating rate of 10 °C·min<sup>-1</sup>.

The metallic copper surface areas and metal dispersions for samples were determined according to H<sub>2</sub>-N<sub>2</sub>O titration. The Cu-ZnO-ZrO<sub>2</sub>-La<sub>2</sub>O<sub>3</sub> catalysts were also characterized by N<sub>2</sub>O chemisorption and H<sub>2</sub>-TPR method using a Quantachrome chemisorption apparatus (ChemBET 3000, USA) with a TCD. Firstly, 50 mg of sample was pretreated in a N<sub>2</sub> flow at 350 °C for 1 h, followed by reduction in a H<sub>2</sub>-N<sub>2</sub> mixed flow (10% H<sub>2</sub>, 30 ml·min<sup>-1</sup>) at 350 °C for 2 h and then cooled to 90 °C under a N<sub>2</sub> flow (30 ml·min<sup>-1</sup>). Next, 10% N<sub>2</sub>O-90% He (30 ml·min<sup>-1</sup>) was introduced at 90 °C for 1h to oxidize Cu to Cu<sub>2</sub>O. Then, H<sub>2</sub>-TPR was conducted in H<sub>2</sub>-N<sub>2</sub> mixed gas (10% H<sub>2</sub>, 30 ml·min<sup>-1</sup>) from 30 °C to 400 °C, and kept at 350 °C for 1 h. Cu<sup>0</sup> surface area (S<sub>Cu</sub>) was calculated according to  $649\times D_{Cu}\times \text{Cu loading (wt\%)}$ .

The reaction equation is as follows:

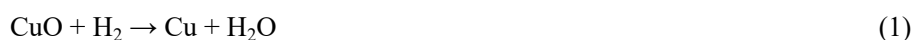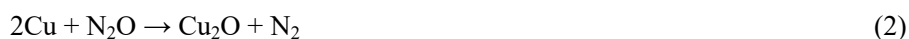

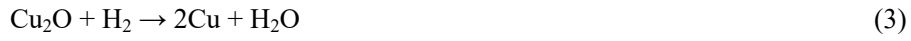

the amount of consumed  $\text{H}_2$  in equation (1) was denoted as X, and the consumption of  $\text{H}_2$  in equation (3) was denoted as Y.

Cu dispersion is:

$$D=(2Y/X) \quad (4)$$

Correspondingly, metallic Cu surface area ( $S_{\text{Cu}}$ ,  $\text{m}^2/\text{g}$ ) was calculated as the following equation:

$$S_{\text{Cu}} = \frac{D_{\text{Cu}} * N_{\text{av}}}{S_{\text{Cu}} * \rho_{\text{Cu}}} \approx 649 \times D_{\text{Cu}} \quad (5)$$

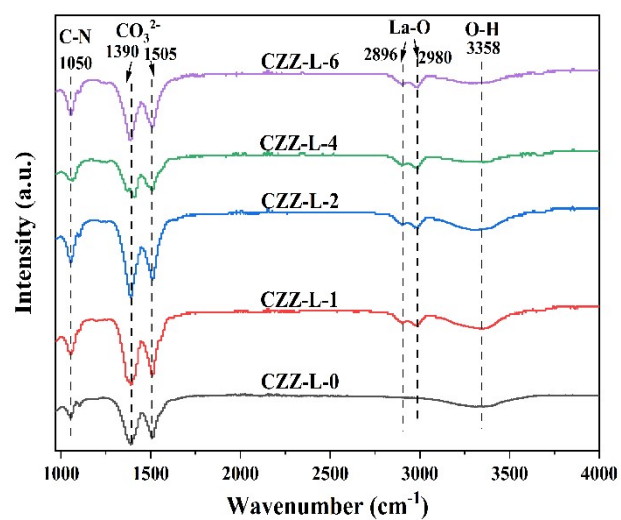

Fig. S1 FT-IR results of the precursors of the different Cu-ZnO-ZrO<sub>2</sub>-La<sub>2</sub>O<sub>3</sub> catalysts.

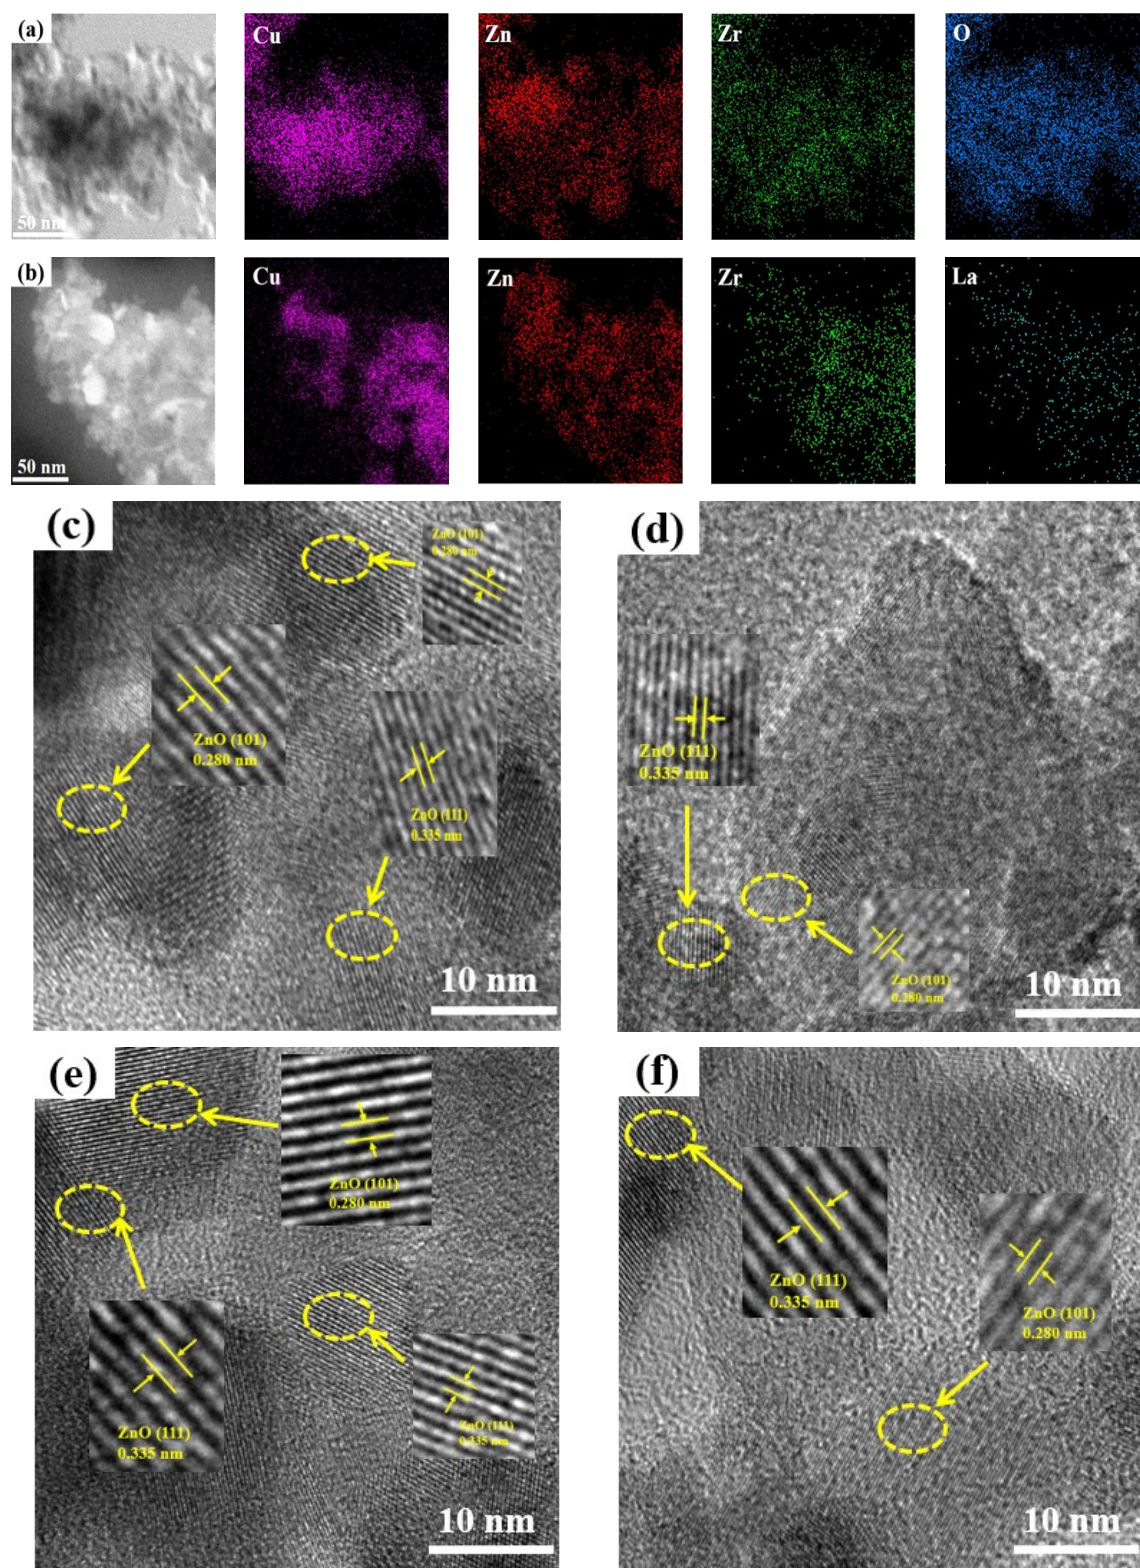

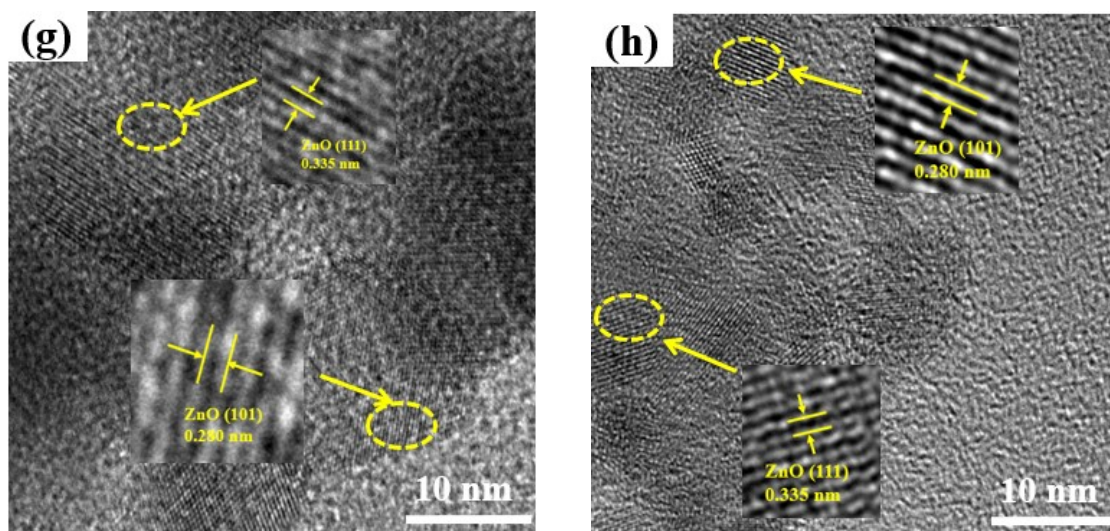

Fig. S2 (a) HAADF-STEM image of the CZZ-L0-CP catalyst and the corresponding elemental maps of Cu, Zn, Zr and O. (b) HAADF-STEM image of the CZZ-L2-CP catalyst and the corresponding elemental maps of Cu, Zn, Zr and La. (c) HRTEM image of CZZ-L0-CP. (d) HRTEM image of CZZ-L1-CP. (e) HRTEM image of CZZ-L2-CP. (f) HRTEM image of CZZ-L4-CP. (g) HRTEM image of CZZ-L6-CP. (h) HRTEM image of CZZ-L2-IM.

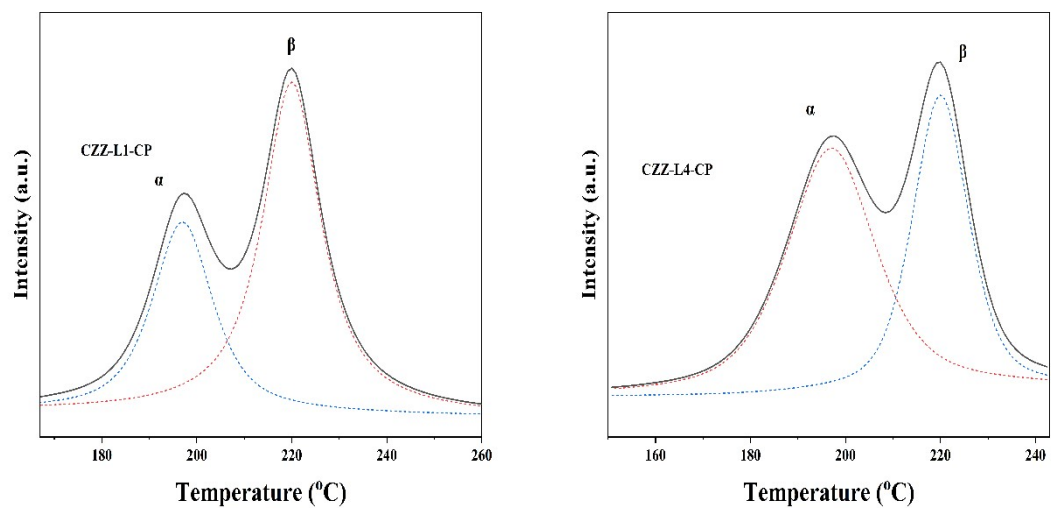

Fig. S3 Results of H<sub>2</sub>-TPR fitting for CZZ-L1-CP and CZZ-L4-CP catalysts.

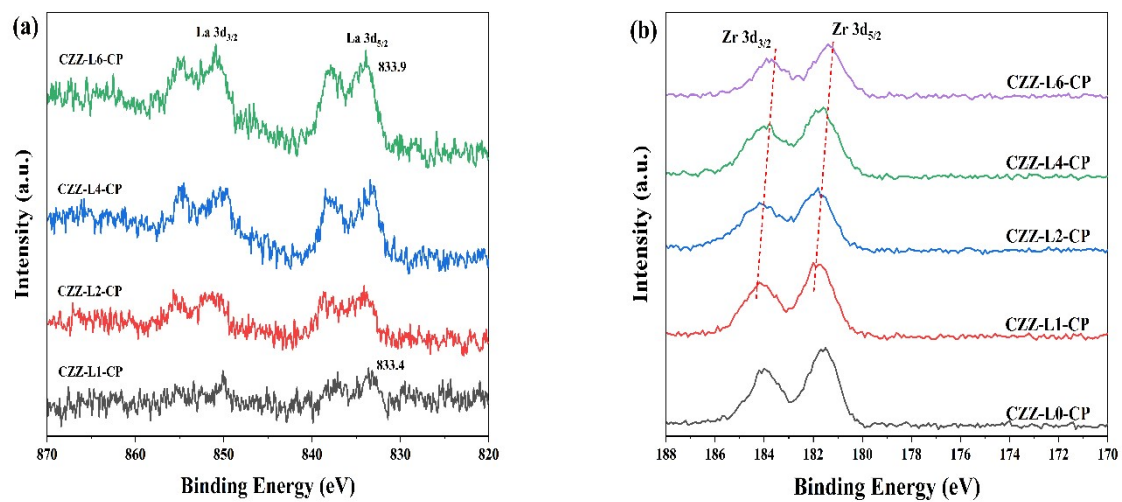

Fig. S4 (a) La 3d XPS spectra. (b) Zr 3d XPS spectra spectra.

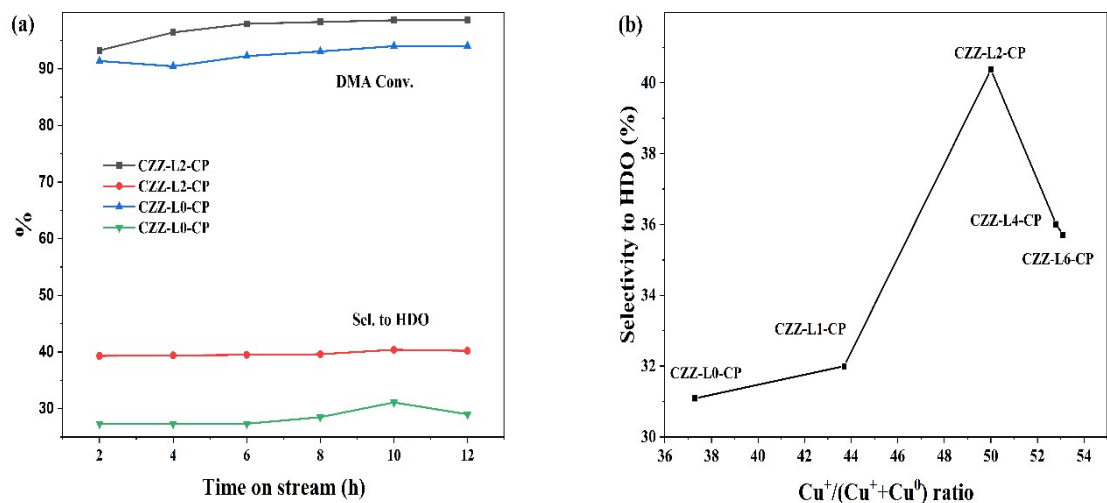

Fig. S5 (a) The conversion of DMA and selectivity of HDO of the CZZ-L0-CP and CZZ-L2-CP catalysts for DMA hydrogenation reaction as a function of the time on stream. (b) The correlation of HDO selectivity with  $\text{Cu}^+ / (\text{Cu}^+ + \text{Cu}^0)$ . Reaction conditions: 8 g of catalyst, 250 °C, 4 MPa  $\text{H}_2$ ,  $\text{H}_2/\text{DMA} = 10$  ( $\text{mol} \cdot \text{mol}^{-1}$ ),  $\text{WHSV}_{\text{DMA}} = 0.5 \text{ g} \cdot \text{g}_{\text{cat}}^{-1} \cdot \text{h}^{-1}$ .

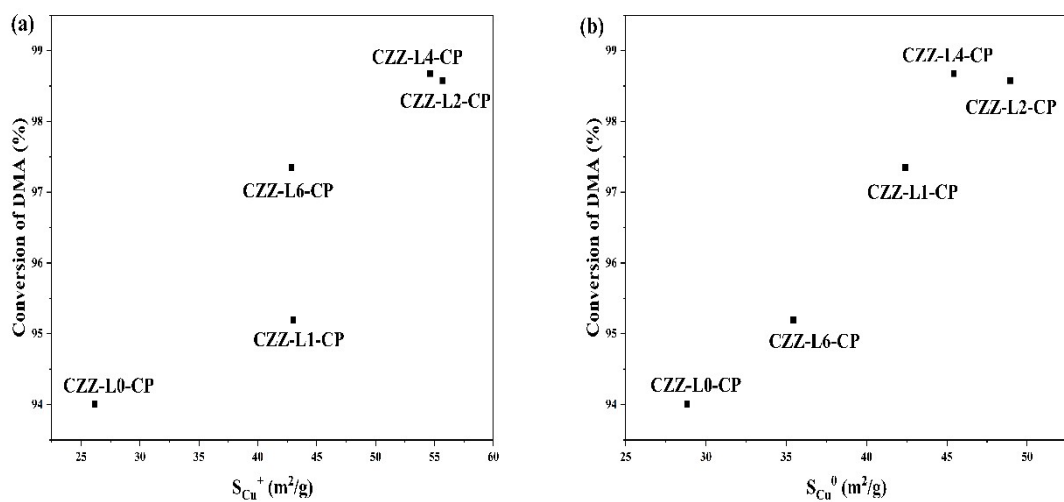

Fig. S6 The correlation of DMA conversion with over Cu<sup>+</sup> (a) and Cu<sup>0</sup> (b) sites plotted along the surface area of Cu<sup>+</sup> and Cu<sup>0</sup> species

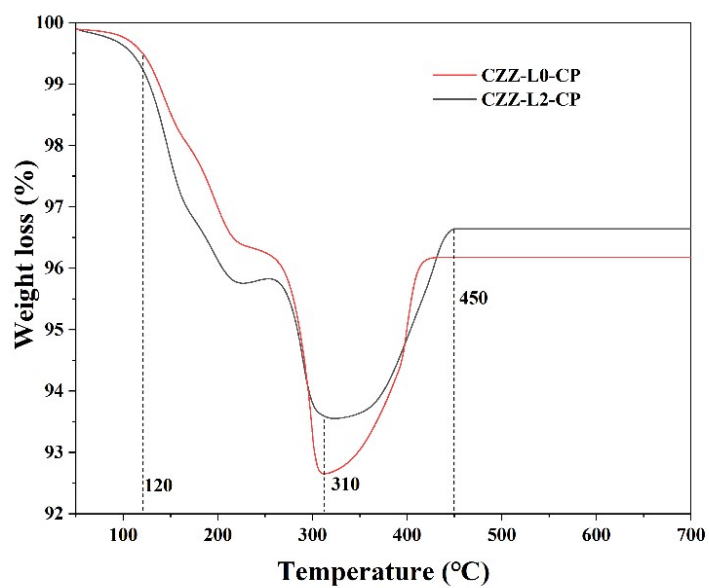

Fig S7 TG profiles of the CZZ-L0-CP and CZZ-L2-CP catalysts after reaction at 250 °C for 12 h.

Table S1 The structural properties of as-calcined samples

| Samples   | $S_{\text{BET}}^{\text{a}}$<br>( $\text{m}^2 \cdot \text{g}^{-1}$ ) | $V_{\text{p, BJH}}^{\text{b}}$<br>( $\text{cm}^3 \cdot \text{g}^{-1}$ ) | $d_{\text{p, BJH}}^{\text{c}}$<br>(nm) | Cu<br>loading<br>(wt%) <sup>d</sup> | Zn<br>loading<br>(wt%) <sup>d</sup> | La<br>loading<br>(wt%) <sup>d</sup> | Crystallite Size<br>of CuO (nm)<br>by XRD <sup>e</sup> |
|-----------|---------------------------------------------------------------------|-------------------------------------------------------------------------|----------------------------------------|-------------------------------------|-------------------------------------|-------------------------------------|--------------------------------------------------------|
| CZZ-L0-CP | 20.6                                                                | 0.096                                                                   | 18.58                                  | 41.9                                | 22.9                                | 0                                   | 17                                                     |
| CZZ-L1-CP | 32.5                                                                | 0.147                                                                   | 18.13                                  | 41.7                                | 22.2                                | 0.98                                | 14                                                     |
| CZZ-L2-CP | 41.1                                                                | 0.212                                                                   | 20.69                                  | 41.3                                | 21.8                                | 1.99                                | 14                                                     |
| CZZ-L4-CP | 31.7                                                                | 0.203                                                                   | 25.59                                  | 40.5                                | 20.8                                | 4.01                                | 14                                                     |
| CZZ-L6-CP | 23.3                                                                | 0.143                                                                   | 24.47                                  | 39.0                                | 20.3                                | 5.99                                | 15                                                     |
| CZZ-L2-IM | 14.6                                                                | 0.081                                                                   | 22.13                                  | 41.2                                | 21.9                                | 2.31                                | 15                                                     |

<sup>a</sup>  $S_{\text{BET}}$ =Specific Surface Area.<sup>b</sup>  $V_{\text{p, BJH}}$ =Total Pore Volume Measured at  $P/P_0=0.99$ .<sup>c</sup>  $d_{\text{p, BJH}}$ =Average BJH adsorption Pore Diameter.<sup>d</sup> Determined by ICP-OES.<sup>e</sup> CuO crystallite size was calculated by the Scherrer equation at  $2\theta=38.8^\circ$ .

Table S2 Physicochemical properties of various CZ-M catalysts

| Samples   | Cu loading (wt%) <sup>a</sup> | Crystallite Size (nm) |                     |
|-----------|-------------------------------|-----------------------|---------------------|
|           |                               | by XRD <sup>b</sup>   | by N <sub>2</sub> O |
| CZZ-L0-CP | 47.5                          | 28                    | 10.8                |
| CZZ-L1-CP | 46.0                          | 24                    | 7.04                |
| CZZ-L2-CP | 45.4                          | 19                    | 6.02                |
| CZZ-L4-CP | 44.5                          | 19                    | 6.37                |
| CZZ-L6-CP | 43.7                          | 26                    | 8.00                |
| CZZ-L2-IM | 45.2                          | 34                    | 16.1                |

<sup>a</sup> Determined by ICP-OES<sup>b</sup> Cu crystallite size was calculated by the Scherrer equation at 2θ=43.2 °

Table S3 Characterization of Cu species for the CZ-X catalysts

| Samples   | $S_{\text{BET}}$<br>( $\text{m}^2 \cdot \text{g}^{-1}$ ) <sup>a</sup> | $V_{\text{p, BJH}}$<br>( $\text{cm}^3 \cdot \text{g}^{-1}$ ) <sup>b</sup> | $d_{\text{p, BJH}}$<br>(nm) <sup>c</sup> | $D_{\text{Cu}}^{\text{d}}$<br>(%) | $D_{\text{Cu}}^{\text{f}}$<br>(%) |
|-----------|-----------------------------------------------------------------------|---------------------------------------------------------------------------|------------------------------------------|-----------------------------------|-----------------------------------|
| CZZ-L0-CP | 11.6                                                                  | 0.054                                                                     | 18.60                                    | 9.3                               | 3.57                              |
| CZZ-L1-CP | 23.1                                                                  | 0.084                                                                     | 14.51                                    | 14.2                              | 3.57                              |
| CZZ-L2-CP | 28.8                                                                  | 0.166                                                                     | 23.11                                    | 16.6                              | 5.26                              |
| CZZ-L4-CP | 26.0                                                                  | 0.100                                                                     | 15.70                                    | 15.7                              | 5.26                              |
| CZZ-L6-CP | 15.4                                                                  | 0.046                                                                     | 11.94                                    | 12.5                              | 3.33                              |
| CZZ-L2-IM | 6.5                                                                   | 0.033                                                                     | 20.67                                    | 6.9                               | 2.94                              |

<sup>a</sup>  $S_{\text{BET}}$ =Specific Surface Area.<sup>b</sup>  $V_{\text{p, BJH}}$ =Total Pore Volume Measured at  $P/P_0=0.99$ .<sup>c</sup>  $d_{\text{p, BJH}}$ =Average BJH adsorption Pore Diameter.<sup>d</sup> Cu dispersion obtained by  $\text{N}_2\text{O}$  titration.<sup>e</sup> Cu dispersion obtained by  $D_{\text{Cu}} (\%) = 1.0/d_{\text{Cu}} (\text{nm})$  ( $d_{\text{Cu}}$ : mean Cu particle size from XRD results).

Table S4 center of reduction peaks and their contributions to the TPR pattern over CZZ-LX catalysts with different La loading

| Samples   | TPR peak position [temperature (°C)] and concentration (%) <sup>a</sup> |              |               |
|-----------|-------------------------------------------------------------------------|--------------|---------------|
|           | Peak $\alpha$                                                           | Peak $\beta$ | Peak $\gamma$ |
| CZZ-L0-CP | -                                                                       | 215 (100)    | -             |
| CZZ-L1-CP | 197 (64.2)                                                              | 220 (35.8)   | -             |
| CZZ-L2-CP | 190 (100)                                                               | -            | -             |
| CZZ-L4-CP | 197 (58.1)                                                              | 220 (41.9)   | -             |
| CZZ-L6-CP | -                                                                       | -            | 285 (100)     |
| CZZ-L2-IM | -                                                                       | -            | 289 (100)     |

<sup>a</sup> Values in parentheses are the contributions (%) of each species.

Table S5 H<sub>2</sub>-TPR results for Cu-ZnO-ZrO<sub>2</sub>-La<sub>2</sub>O<sub>3</sub> samples

| Samples   | Cu content <sup>a</sup><br>(wt%) | Amount of H <sub>2</sub><br>consumption <sup>b</sup><br>(mmol·g <sub>cat</sub> <sup>-1</sup> ) | Stoichiometry of H <sub>2</sub> <sup>c</sup><br>(mmol·g <sub>cat</sub> <sup>-1</sup> ) |
|-----------|----------------------------------|------------------------------------------------------------------------------------------------|----------------------------------------------------------------------------------------|
| CZZ-L0-CP | 47.5                             | 1.96                                                                                           | 7.48                                                                                   |
| CZZ-L1-CP | 46.0                             | 1.81                                                                                           | 7.24                                                                                   |
| CZZ-L2-CP | 45.4                             | 1.68                                                                                           | 7.15                                                                                   |
| CZZ-L4-CP | 44.5                             | 1.45                                                                                           | 7.01                                                                                   |
| CZZ-L6-CP | 43.7                             | 1.39                                                                                           | 6.88                                                                                   |
| CZZ-L2-IM | 45.2                             | 1.72                                                                                           | 7.12                                                                                   |

<sup>a</sup> Determined by ICP-OES.<sup>b</sup> Amount of H<sub>2</sub> consumption was determined from H<sub>2</sub>-TPR results.<sup>c</sup> Stoichiometry of H<sub>2</sub> consumption was calculated for reduction of Cu species to Cu<sup>0</sup> based on the actual Cu content (the atomic ratio between H<sub>2</sub> and Cu species is 1:1).

Table S6 Characterization of Cu species and surface atom concentrations for the CZZ-LX catalysts

| Samples   | $S_{Cu^0}^a$<br>( $m^2 \cdot g^{-1}$ ) | $S_{Cu^+}^b$<br>( $m^2 \cdot g^{-1}$ ) | $X_{Cu^+}^b$ (%) | $X_{Ov}^d$ (%) | $X_{Zr^{3+}}^e$ (%) | $STY_{HDO}^f$<br>( $g \cdot g_{cat}^{-1} \cdot h^{-1}$ ) |
|-----------|----------------------------------------|----------------------------------------|------------------|----------------|---------------------|----------------------------------------------------------|
| CZZ-L0-CP | 28.81                                  | 26.14                                  | 37.3             | 53.5           | -                   | 9.91                                                     |
| CZZ-L1-CP | 42.41                                  | 42.85                                  | 43.7             | 45.4           | 19.0                | 10.56                                                    |
| CZZ-L2-CP | 48.94                                  | 55.69                                  | 50.0             | 61.8           | 22.6                | 13.51                                                    |
| CZZ-L4-CP | 45.34                                  | 54.64                                  | 52.8             | 50.2           | 16.1                | 12.85                                                    |
| CZZ-L6-CP | 35.45                                  | 43.00                                  | 53.1             | 45.9           | 13.8                | 12.07                                                    |

<sup>a</sup> Metallic copper surface area determined by  $H_2$ - $N_2O$  titration.

<sup>b</sup>  $S_{Cu^+} = Cu^+$  Surface area, calculated on the basis of  $X_{Cu^+}$  and  $S_{Cu^0}$ .

<sup>c</sup>  $X_{Cu^+}$  represents  $Cu^+/(Cu^+ + Cu^0)$  ratio calculated from Cu LMM spectra.

<sup>d</sup>  $X_{Ov}$  represents  $O_{vac}/(O_{latt} + O_{vac} + O_{ads})$  ratio calculated from XPS.

<sup>e</sup>  $X_{Zr^{3+}}$  represents  $Zr^{3+}/(Zr^{3+} + Zr^{4+})$  ratio calculated from XPS.

<sup>f</sup>  $STY_{HDO}$  is denoted as the space time yield of HDO and calculated as gram of HDO per gram of catalyst per hour ( $g \cdot g_{cat}^{-1} \cdot h^{-1}$ ).

Table S7 The temperatures and areas of CO<sub>2</sub> desorption peaks with different La loadings

| Samples   | T/°C | A/(a.u.) | Ratio/% |
|-----------|------|----------|---------|
| CZZ-L0-CP | 81   | 77.7     | 100     |
| CZZ-L1-CP | 86   | 83.4     | 107     |
| CZZ-L2-CP | 97   | 130.3    | 168     |
| CZZ-L4-CP | 86   | 114.2    | 147     |
| CZZ-L6-CP | 80   | 67.8     | 87      |
| CZZ-L2-IM | 75   | 56.1     | 72      |
